# Supplementary material
Source: PubMed Central journal article supplement (PMC4974106)
Supplement: mmc1.pdf [file mmc1.pdf]

**The American Journal of Human Genetics, Volume 99**

## **Supplemental Data**

### **Mutations in Citron Kinase Cause Recessive**

### **Microlissencephaly with Multinucleated Neurons**

**Brian N. Harding, Amanda Moccia, Séverine Drunat, Omar Soukarieh, Hélène Tubeuf, Lyn S. Chitty, Alain Verloes, Pierre Gressens, Vincent El Ghouzzi, Sylvie Joriot, Ferdinando Di Cunto, Alexandra Martins, Sandrine Passemard, and Stephanie L. Bielas**

## Supplemental Data

A

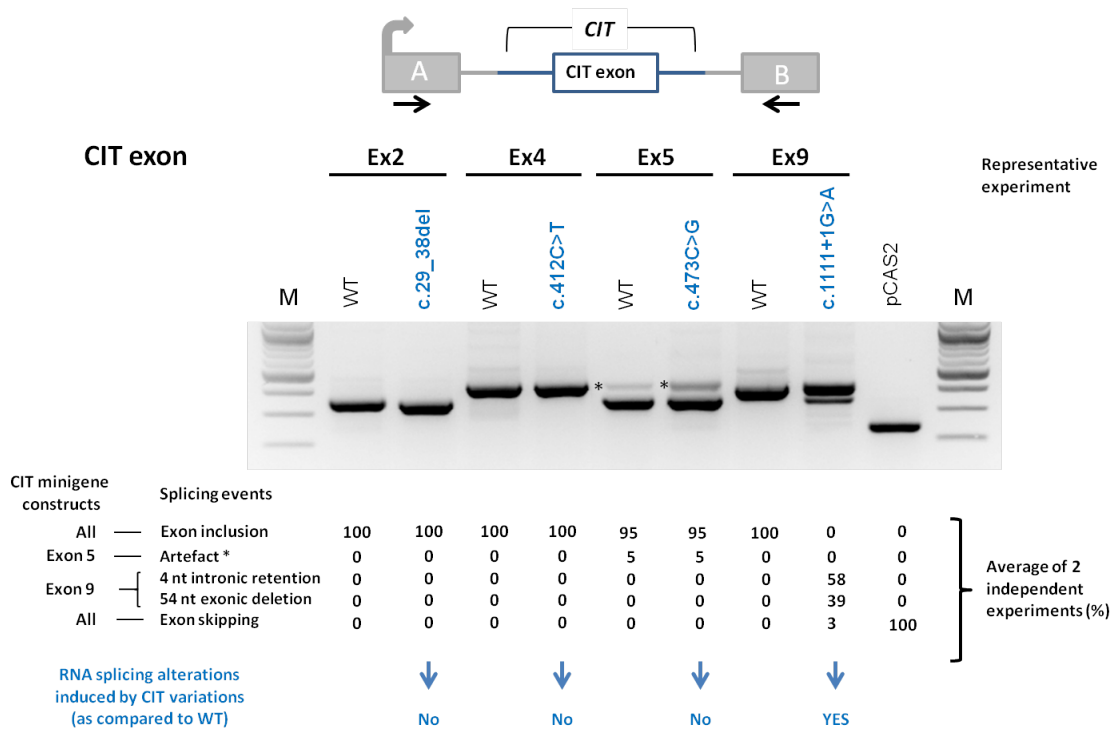

B

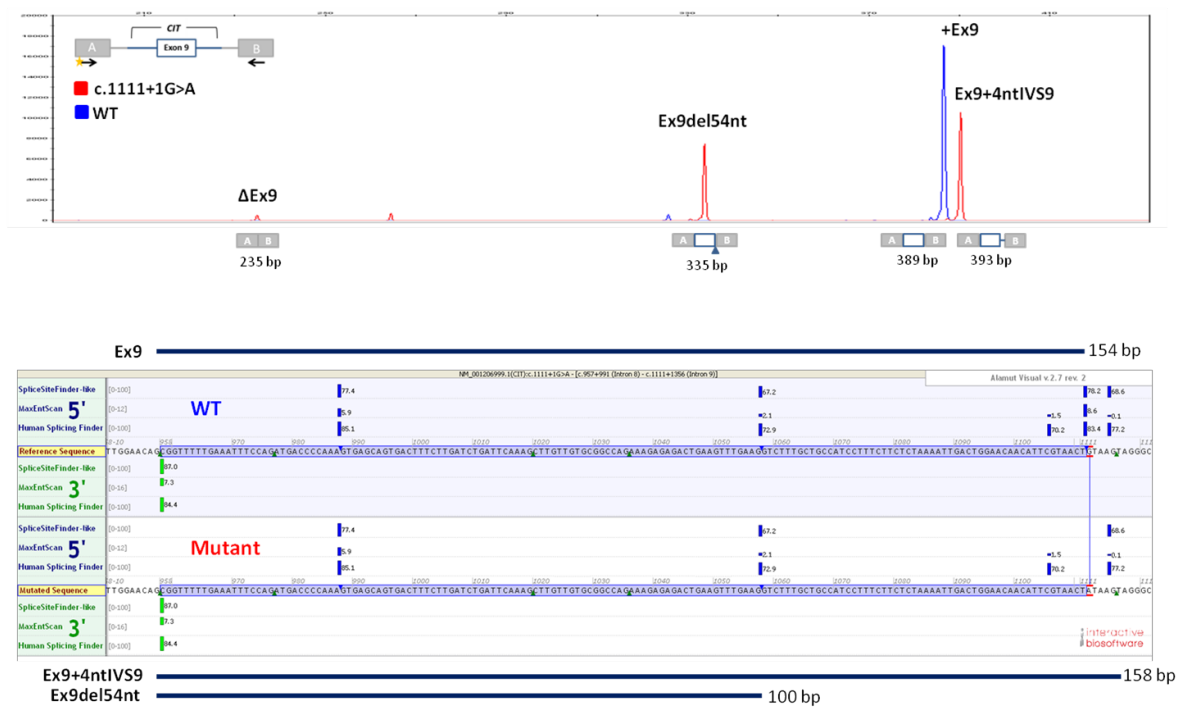

**Figure S1.** Detection of variant-induced *CIT* splicing alterations by using a minigene splicing assay. (A) Analysis of the splicing pattern of pCAS2 minigenes carrying *CIT* variants identified in microcephaly probands described in this study, as indicated. The top panel

represents the structure of pCAS2-CIT minigenes used in the minigene splicing assay. The grey arrow indicates the CMV promoter, boxes represent exons, lines in between indicate introns, and arrows below the exons represent primers used in RT-PCR reactions (Table S1). The minigenes were generated by inserting a genomic fragment containing the exon of interest and at least 150 nucleotides of the flanking introns into the intron of pCAS2, as described in Gaildrat et al. (either by using proband gDNA as template or by introducing the variants into the minigenes by site-directed mutagenesis)<sup>1</sup>. Then, wild-type (WT) and mutant constructs, as indicated, were transfected into HeLa cells and the minigenes' transcripts were analyzed by RT-PCR 24 hours later. The image shows the results of a representative experiment in which the RT-PCR products were separated on a 2.5% agarose gel stained with ethidium bromide and visualized by exposure to ultraviolet light. M indicates a 100 bp DNA ladder (New England Biolabs). The splicing events indicated under the gel are based on equivalent RT-PCR reactions performed by using a fluorescent forward primer (Table S1) and then separated in denaturing conditions by capillary electrophoresis on an automated sequencer (Applied Biosystems). Quantification results were obtained by using the GeneMapper v5.0 software (Applied Biosystems) and correspond to the average of two fluorescent-RT-PCR independent experiments. (B) Representative fluorescent RT-PCR experiment using pCAS2-CIT c.11111+1G>A-derived data as an example. The top panel shows superposed peaks corresponding to the WT and mutant products (in blue and red, respectively), as indicated. The bottom panel illustrates the outcome of the minigene assay relative to CIT exon 9 splicing both in the WT (top) and mutant (bottom) contexts, as well as *in silico* predictions relative to 5'ss and 3'ss in the genomic region of interest. *In silico* predictions were obtained by simultaneously interrogating 3 algorithms (SpliceSiteFinder-Like, MaxEntScan, and Human Splice Finder) through the integrated software tool Alamut (Interactive Biosoftware, France, <http://www.interactive-biosoftware.com>), as previously described<sup>2</sup>. For simplicity, thresholds for 5'ss and 3'ss scores were set at 66 and 84 for SpliceSiteFinder-Like, 0 and 7 for MaxEntScan, and at 70 and 84 for Human Splice Finder, respectively.

A

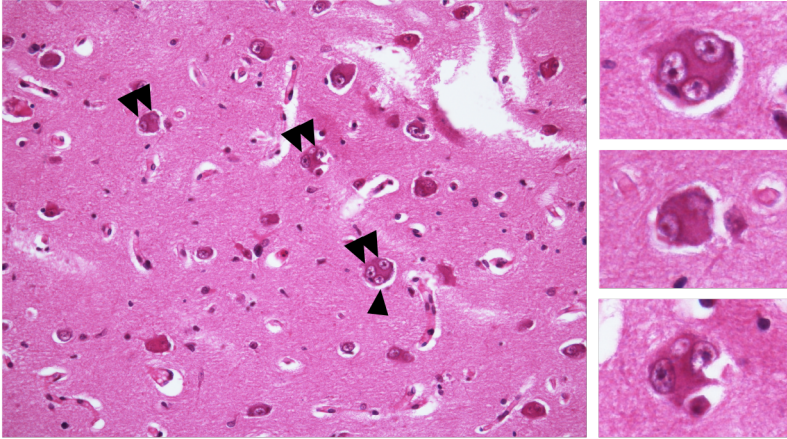

B

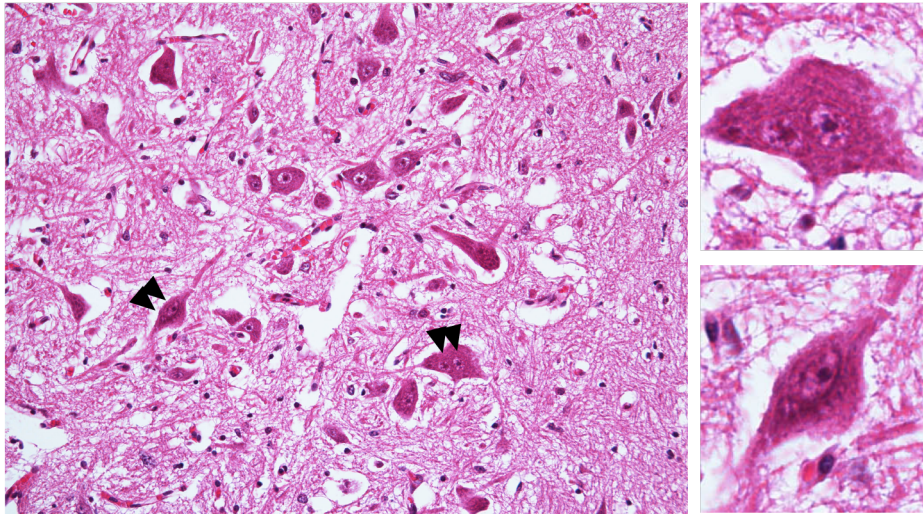

**Figure S2.** Multinucleated neurons throughout the neuraxis of Proband B. **(A)** Thalamus, **(B)** Spinal cord anterior horn. Cells indicated by arrowheads are enlarged in the inserts and multinucleated.

**Table S1.** Primers used in the pCAS2 minigene splicing assay for the analysis of *CIT* variations in exons 2, 4, 5 and 9.

| Purpose                                                     | Forward (F) or reverse (R) primers |                                             |
|-------------------------------------------------------------|------------------------------------|---------------------------------------------|
|                                                             | Name                               | Sequence (5'-3')                            |
| PCR<br>(cloning/minigene<br>preparation)                    | CIT_Ex2 InFus BamHI-F              | AAGAAGTGCAGGATCCGTCAGATAAGTGTATCATCTCCTGTCA |
|                                                             | CIT_Ex2 InFus Mlul-R               | TCAAACAAGACGCGTTCCTCCCTAAAATATTATCCCTGGTCC  |
|                                                             | CIT_Ex4 InFus BamHI-F              | AAGAAGTGCAGGATCCGTAGCTGCCATGGAACTGTAC       |
|                                                             | CIT_Ex4 InFus Mlul-R               | TCAAACAAGACGCGTCATCAAGAGGAATTTGTGAGCCTTC    |
|                                                             | CIT_Ex5 InFus BamHI-F              | AAGAAGTGCAGGATCCGGCTAAGTGACAGCCCCTTC        |
|                                                             | CIT_Ex5 InFus Mlul-R               | TCAAACAAGACGCGTACCACGTTCCAGCCCAATGAG        |
|                                                             | CIT.ex9.BamHI-F                    | TGGGAAGGATCCTTTGGTCCAAAGGGAAGAGGG           |
|                                                             | CIT.ex9.Mlul-R                     | ACTCAAACGCGTCTACATCATTAGCCTTTACTACTCCTGTAG  |
| Sequencing of<br>minigene inserts                           | pCAS-Seq-F                         | GGGTCAATAGCAGTGAGAGG                        |
|                                                             | pCAS-Seq-R                         | GCTCCATTTACAGGTAGAGA                        |
| Site-directed<br>mutagenesis<br>by two-stage<br>overlap PCR | CIT Ex2 c.29_38del-F               | ATATGGAGCGCGGATGCTGGTGCTGCTG                |
|                                                             | CIT Ex2 c.29_38del-R               | CAGCAGCACCAGCATCCGCGCTCCATAT                |
|                                                             | CIT Ex4 c.412CT-F                  | GGCCCAGGAGTAGGTAGGAGG                       |
|                                                             | CIT Ex4 c.412CT-R                  | CCTCCTACCTACTCCTGGGCC                       |
|                                                             | CIT Ex5 c.473CG-F                  | GCCCGTGGATCCGCCAATTACAG                     |
|                                                             | CIT Ex5 c.473CG-R                  | CTGTAATTGGCGGATCCACGGGC                     |
| RT-PCR and<br>sequencing of<br>RT-PCR products              | pCAS-KO1-F                         | TGACGTCGCCGCCATCAC                          |
|                                                             | pCAS-2R                            | ATTGGTTGTTGAGTTGGTTGTC                      |
| Fluorescent<br>RT-PCR                                       | 6FAM-pCAS-KO1-F                    | TGACGTCGCCGCCATCAC                          |
|                                                             | pCAS-2R                            | ATTGGTTGTTGAGTTGGTTGTC                      |

**Table S2.** Mammalian models of null mutations in *CIT*.

| Species                                             | Human Proband B                                                                                                                                                                                                           | <i>Cit</i> <sup>-/-</sup> Knockout Mouse <sup>3</sup><br>(Di Cunto et al. 2000)                                                                   | <i>Flathead fh/fh</i> Mutant Rat <sup>4,5</sup><br>(Sarkisian et al. 2002)<br>(Ackman et al. 2007)                              |
|-----------------------------------------------------|---------------------------------------------------------------------------------------------------------------------------------------------------------------------------------------------------------------------------|---------------------------------------------------------------------------------------------------------------------------------------------------|---------------------------------------------------------------------------------------------------------------------------------|
| <b><i>Citron Kinase</i> Mutation</b>                | 10 bp deletion in exon 2                                                                                                                                                                                                  | Conditional excision exon 2<br>by <i>Cre</i> mediated<br>homologous recombination                                                                 | Spontaneous 1 bp deletion in<br>exon 1                                                                                          |
| <b>Predicted Mutational Impact</b>                  | Frameshift causing a<br>premature stop codon 25<br>amino acids from start site                                                                                                                                            | Premature stop codon                                                                                                                              | Frameshift causing a<br>premature stop codon 27<br>amino acids from start site                                                  |
| <b><i>CIT</i> Transcript</b>                        | Predicted NMD                                                                                                                                                                                                             | NMD                                                                                                                                               | NMD                                                                                                                             |
| <b>Brain Size and Weight</b>                        | Microcephalic and ~1/10 of<br>the brain weight of an<br>average newborn                                                                                                                                                   | Microcephalic<br>50% brain weight reduction                                                                                                       | Microcephalic<br>50% brain size reduction                                                                                       |
| <b>Cerebral Cortex Abnormalities</b>                | Cortex shows cytological and<br>organizational abnormalities.<br>Six layer arrangement<br>replaced by a molecular<br>layer and two broad layers.<br>Presence of multinucleated<br>neurons.                                | 40% reduction in cerebral<br>cortex thickness.<br>Disorganized lamination of 6-<br>layer cortex. Presence of<br>binucleated cells.                | Neocortex displays a reduced<br>number of neurons but normal<br>lamination. Presence of<br>binucleated neurons in<br>neocortex. |
| <b>Cerebellar Abnormalities</b>                     | Hypoplastic and dysplastic<br>cerebellar cortex, and<br>disrupted laminar<br>architecture. Crowded layer<br>of Purkinje cells with simple<br>dendritic arborizations.<br>Binucleated Purkinje cells<br>and granule cells. | 70% cerebellum size<br>reduction. Crowded layer of<br>Purkinje cells with simple<br>dendritic arborizations.<br>Presence of binucleated<br>cells. | Cerebellum displays a<br>reduced number of neurons.<br>Presence of binucleated<br>neurons.                                      |
| <b>Hippocampal Abnormalities</b>                    | Small and disorganized<br>Ammon's horns. Only a small<br>remnant of dentate fascia.<br>Binucleated granule cells.                                                                                                         | Normal Ammon's horn cell<br>density and lamination.<br>Essentially absent dentate<br>gyrus.                                                       | Dentate gyrus displays a<br>reduced number of neurons.<br>Presence of binucleated<br>neurons.                                   |
| <b>Additional Locations of Multinucleated Cells</b> | Thalamus, striatum,<br>pallidum, brain stem, spinal<br>cord and PNS                                                                                                                                                       | Thalamus                                                                                                                                          | Striatum, thalamus, midbrain,<br>hindbrain, and spinal cord                                                                     |
| <b>Other Phenotypic Abnormalities</b>               | Kidney and heart defects,<br>facial dysmorphisms, and<br>rotated lower limbs                                                                                                                                              | Ataxia, seizures, and failure<br>to thrive                                                                                                        | Seizures and disrupted<br>development of the retina                                                                             |

NMD = Nonsense mediated decay, PNS = Peripheral Nervous System

**Table S3.** Presence of binucleated neurons by neuroanatomic area.

| Presence of binucleated neurons by anatomic area |                                                |
|--------------------------------------------------|------------------------------------------------|
| <b>neocortex</b>                                 |                                                |
| <b>hippocampus</b> (pyramidal and granule cells) |                                                |
| <b>thalamus</b>                                  |                                                |
| <b>striatum</b> (large and small cells)          |                                                |
| <b>pallidum</b>                                  |                                                |
| <b>cerebellum</b>                                | cerebellar cortex (Purkinje and granule cells) |
|                                                  | dentate nucleus                                |
| <b>brain stem</b>                                | midbrain tectum                                |
|                                                  | oculomotor nuclei                              |
|                                                  | pontine reticular formation                    |
|                                                  | nuclei pontis                                  |
|                                                  | abducens nucleus                               |
|                                                  | inferior olive                                 |
|                                                  | red nucleus                                    |
| <b>spinal cord &amp; PNS</b>                     | anterior horn                                  |
|                                                  | autonomic ganglion                             |

PNS = Peripheral nervous system

## Supplemental References

1. Gaildrat, P., Killian, A., Martins, A., Tournier, I., Frébourg, T., and Tosi, M. (2010). Use of splicing reporter minigene assay to evaluate the effect on splicing of unclassified genetic variants. *Methods Mol Biol* 653, 249-257.
2. Soukarieh, O., Gaildrat, P., Hamieh, M., Drouet, A., Baert-Desurmont, S., Frébourg, T., Tosi, M., and Martins, A. (2016). Exonic Splicing Mutations Are More Prevalent than Currently Estimated and Can Be Predicted by Using In Silico Tools. *PLoS Genet* 12, e1005756.
3. Di Cunto, F., Imarisio, S., Hirsch, E., Broccoli, V., Bulfone, A., Migheli, A., Atzori, C., Turco, E., Triolo, R., Dotto, G.P., et al. (2000). Defective neurogenesis in citron kinase knockout mice by altered cytokinesis and massive apoptosis. *Neuron* 28, 115-127.
4. Sarkisian, M.R., Li, W., Di Cunto, F., D'Mello, S.R., and LoTurco, J.J. (2002). Citron-kinase, a protein essential to cytokinesis in neuronal progenitors, is deleted in the flathead mutant rat. *J Neurosci* 22, RC217.
5. Ackman, J.B., Ramos, R.L., Sarkisian, M.R., and Loturco, J.J. (2007). Citron kinase is required for postnatal neurogenesis in the hippocampus. *Dev Neurosci* 29, 113-123.
